# Supplementary material for: Eleutheroside E supplementation prevents radiation-induced cognitive impairment and activates PKA signaling via gut microbiota
Source: PubMed Central journal article supplement (PMC9270490; doi:10.1038/s42003-022-03602-7), 2022-07-08
Supplement: 42003_2022_3602_MOESM2_ESM.pdf [file 42003_2022_3602_MOESM2_ESM.pdf]

## Supplementary Table 1

Supplementary Table 1 The PCR primer sequences

| Genes                            | Primer sequences (5'-3')  |
|----------------------------------|---------------------------|
| <i><math>\beta</math>-actinF</i> | ATCACTATTGGCAACGAGCGGTTTC |
| <i><math>\beta</math>-actinR</i> | CAGCACTGTGTTGGCATAGAGGTC  |
| <i>TNF-<math>\alpha</math>F</i>  | GTCCGGGCAGGTCTACTTTG      |
| <i>TNF-<math>\alpha</math>R</i>  | GGGGCTCTGAGGAGTAGACA      |
| <i>IL1-<math>\beta</math>F</i>   | TGCCACCTTTTGACAGTGATG     |
| <i>IL1-<math>\beta</math>R</i>   | ATGTGCTGCTGCGAGATTTG      |
| <i>IL-6</i>                      | TGATGGATGCTACCAAAGTGA     |
| <i>IL-6</i>                      | TGTGACTCCAGCTTATCTCTTGG   |
| <i>occludinF</i>                 | GTCCCTCCTGGCTCAGTTGAA     |
| <i>occludinR</i>                 | AGAGTACGCTGGCTGAGAGA      |
| <i>claudin-3F</i>                | ACTGCGTACAAGACGAGACG      |
| <i>claudin-3R</i>                | TCCCTGATGATGGTGTGGC       |
| <i>ZO-1F</i>                     | TCTTGCAAAGTATCCCTTCTGT    |
| <i>ZO-1R</i>                     | GAAATCGTGCTGATGTGCCA      |
