# Supplementary material for: Eleutheroside E supplementation prevents radiation-induced cognitive impairment and activates PKA signaling via gut microbiota
Source: PubMed Central journal article supplement (PMC9270490; doi:10.1038/s42003-022-03602-7), 2022-07-08
Supplement: 42003_2022_3602_MOESM3_ESM.pdf [file 42003_2022_3602_MOESM3_ESM.pdf]

## Description of Additional Supplementary Files

**File name:** Supplementary Data 1

**Description:** source data behind the graphs in the paper.
